# Supplementary material for: Nurses' preparedness to care for women exposed to Intimate Partner Violence: a quantitative study in primary health care
Source: Springer Nature journal article supplement (doi:10.1186/1472-6955-11-1), 2012-01-10

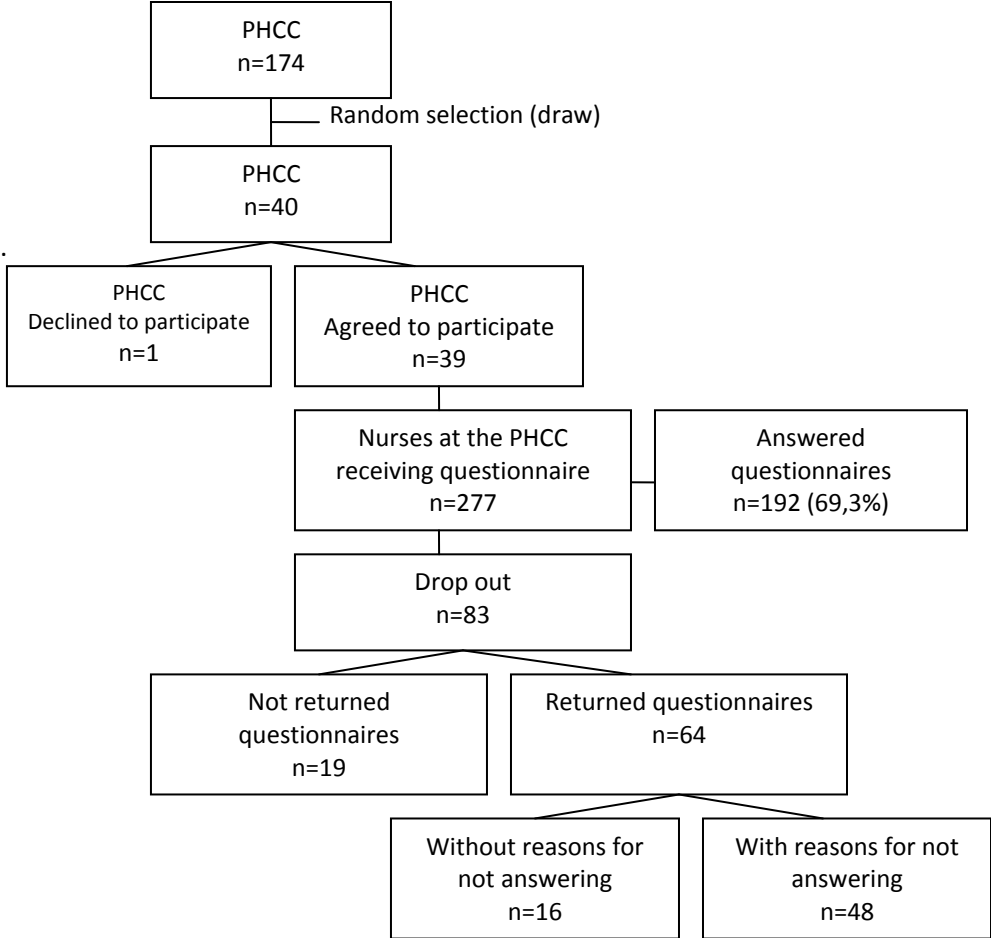

Supplement: 12912_2011_101_MOESM1_ESM.pdf [file 12912_2011_101_MOESM1_ESM.pdf]
